# Supplementary material
Source: PubMed Central journal article supplement (PMC5656058)
Supplement: NIHMS879047-supplement-Supp_materials.pdf [file NIHMS879047-supplement-Supp_materials.pdf]

Web-based Supplementary Materials for  
*A Bayesian model for quantifying the change in  
mortality associated with future ozone exposures  
under climate change*

Stacey E. Alexeeff, Gabriele G. Pfister, Doug Nychka

## Web Appendix A

### Proof of exact integral solutions in Section 3.2

#### Lemma 1.

Suppose  $\beta$  is a scalar random variable and  $\mathbf{X}$  is a random vector of length  $N \times T$ . Let  $\beta$  be Normally distributed,  $\beta \sim N(\mu, \sigma^2)$ , and assume  $\mathbf{X}$  has some arbitrary multivariate distribution  $F_{\mathbf{X}}$ . Also assume that  $\beta$  and  $\mathbf{X}$  are independent. Let  $c_1, \dots, c_N$  be constants.

Then define a new scalar random variable  $D$  such that  $D = \sum_{i=1}^N \sum_{t=1}^T c_i \exp(\beta x_{it})$ . It follows that

- (i) the expectation of  $D$  is

$$E(D) = \int \sum_{t=1}^T \sum_{i=1}^N c_i \exp \{x_{it}\mu + \sigma^2 x_{it}^2/2\} f_{\mathbf{X}}(\mathbf{x}) d\mathbf{x},$$

and

- (ii) the variance of  $D$  is

$$\begin{aligned} Var(D) = & \int \sum_{i=1}^N \sum_{j=1}^N \sum_{t=1}^T \sum_{s=1}^T c_i c_j \exp [\mu(x_{it} + x_{js}) + \sigma^2(x_{it} + x_{js})^2/2] f_{\mathbf{X}}(\mathbf{x}) d\mathbf{x} \\ & - \left[ \int \sum_{i=1}^N \sum_{t=1}^T c_i \exp \{x_{it}\mu + \sigma^2 x_{it}^2/2\} f_{\mathbf{X}}(\mathbf{x}) d\mathbf{x} \right]^2 \end{aligned}$$

**Proof of Lemma 1.**

Proof of (i).

Starting with the definition of expectation, we combine the exponential terms in  $D$  and in the probability distribution function for  $\beta$ . Then by completing the square and rearranging terms again, we isolate an integral of another Normal distribution wrt  $\beta$  with a different mean and variance. Integrating over the density of the pdf is 1, yielding our result.

$$\begin{aligned}
E(D) &= \int \int D f_{\beta}(\beta) f_{\mathbf{X}}(\mathbf{x}) d\beta d\mathbf{x} \\
&= \int \int \sum_{i=1}^N \sum_{t=1}^T c_i \exp(\beta x_{it}) \frac{1}{\sqrt{2\pi\sigma^2}} \exp\{-(\beta - \mu)^2/(2\sigma^2)\} f_{\mathbf{X}}(\mathbf{x}) d\beta d\mathbf{x} \\
&= \int \sum_{i=1}^N \sum_{t=1}^T c_i \int \frac{1}{\sqrt{2\pi\sigma^2}} \exp\{-(\beta^2 - 2\beta\mu + \mu^2 - 2\sigma^2\beta x_{it})/(2\sigma^2)\} d\beta f_{\mathbf{X}}(\mathbf{x}) d\mathbf{x} \\
&= \int \sum_{i=1}^N \sum_{t=1}^T c_i \int \frac{1}{\sqrt{2\pi\sigma^2}} \exp\left\{-\left(\beta^2 - 2\beta[\mu + \sigma^2 x_{it}] + \mu^2 + 2\sigma^2 x_{it}\mu + [\sigma^2 x_{it}]^2 - 2\sigma^2 x_{it}\mu - [\sigma^2 x_{it}]^2\right)/(2\sigma^2)\right\} d\beta f_{\mathbf{X}}(\mathbf{x}) d\mathbf{x} \\
&= \int \sum_{i=1}^N \sum_{t=1}^T c_i \int \frac{1}{\sqrt{2\pi\sigma^2}} \exp\{-(\beta - [\mu + \sigma^2 x_{it}])^2/(2\sigma^2)\} \exp\{-(-2\sigma^2 x_{it}\mu - [\sigma^2 x_{it}]^2)/(2\sigma^2)\} d\beta f_{\mathbf{X}}(\mathbf{x}) d\mathbf{x} \\
&= \int \sum_{i=1}^N \sum_{t=1}^T c_i \exp\{x_{it}\mu + \sigma^2 x_{it}^2/2\} \int \frac{1}{\sqrt{2\pi\sigma^2}} \exp\{-(\beta - [\mu + \sigma^2 x_{it}])^2/(2\sigma^2)\} d\beta f_{\mathbf{X}}(\mathbf{x}) d\mathbf{x} \\
&= \int \sum_{i=1}^N \sum_{t=1}^T c_i \exp\{x_{it}\mu + \sigma^2 x_{it}^2/2\} f_{\mathbf{X}}(\mathbf{x}) d\mathbf{x}
\end{aligned}$$

Proof of (ii).

First,

$$\text{Var}(D) = E(D^2) - E(D)^2$$

We have already derived an expression for  $E[D]$  in part (i). Next, we derive an expression for  $E[D^2]$ . By repeatedly applying the identity  $(\sum_i a_i)^2 = \sum_{i,j} a_i a_j$  for a sequence  $a_i$ , and following the steps in the proof of part (i) by completing the square and isolating an integral of another Normal distribution wrt  $\beta$ , we obtain,

$$\begin{aligned} E(D^2) &= \int \int D^2 f_\beta(\beta) f_{\mathbf{X}}(\mathbf{x}) d\beta d\mathbf{x} \\ &= \int \int \left\{ \sum_{i=1}^N \sum_{t=1}^T c_i \exp(\beta x_{it}) \right\}^2 \frac{1}{\sqrt{2\pi\sigma^2}} \exp\{-\beta^2/(2\sigma^2)\} f_{\mathbf{X}}(\mathbf{x}) d\beta d\mathbf{x} \\ &= \int \int \sum_{i=1}^N \sum_{j=1}^N \sum_{t=1}^T \sum_{s=1}^T c_i \exp(\beta x_{it}) c_j \exp(\beta x_{js}) \frac{1}{\sqrt{2\pi\sigma^2}} \exp\{-\beta^2/(2\sigma^2)\} f_{\mathbf{X}}(\mathbf{x}) d\beta d\mathbf{x} \\ &= \int \int \sum_{i=1}^N \sum_{j=1}^N \sum_{t=1}^T \sum_{s=1}^T c_i c_j \frac{1}{\sqrt{2\pi\sigma^2}} \exp[-\{\beta^2 - 2\beta(\mu + \sigma^2 x_{it} + \sigma^2 x_{js}) + \mu^2\}/(2\sigma^2)] f_{\mathbf{X}}(\mathbf{x}) d\beta d\mathbf{x} \\ &= \int \int \sum_{i=1}^N \sum_{j=1}^N \sum_{t=1}^T \sum_{s=1}^T c_i c_j \frac{1}{\sqrt{2\pi\sigma^2}} \exp\left[-\{\beta^2 - 2\beta(\mu + \sigma^2 x_{it} + \sigma^2 x_{js}) + (\mu + \sigma^2 x_{it} + \sigma^2 x_{js})^2 - (\mu + \sigma^2 x_{it} + \sigma^2 x_{js})^2 + \mu^2\}/(2\sigma^2)\right] f_{\mathbf{X}}(\mathbf{x}) d\beta d\mathbf{x} \\ &= \int \sum_{i=1}^N \sum_{j=1}^N \sum_{t=1}^T \sum_{s=1}^T c_i c_j \left\{ \int \frac{1}{\sqrt{2\pi\sigma^2}} \exp[-\{\beta - (\mu + \sigma^2 x_{it} + \sigma^2 x_{js})\}^2/(2\sigma^2)] d\beta \right\} \\ &\quad \cdot \exp\left[\mu(x_{it} + x_{js}) + \sigma^2(x_{it} + x_{js})^2/2\right] f_{\mathbf{X}}(\mathbf{x}) d\mathbf{x} \\ &= \int \sum_{i=1}^N \sum_{j=1}^N \sum_{t=1}^T \sum_{s=1}^T c_i c_j \exp\left[\mu(x_{it} + x_{js}) + \sigma^2(x_{it} + x_{js})^2/2\right] f_{\mathbf{X}}(\mathbf{x}) d\mathbf{x} \end{aligned}$$

Hence,

$$\begin{aligned} \text{Var}(D) &= \int \sum_{i=1}^N \sum_{j=1}^N \sum_{t=1}^T \sum_{s=1}^T c_i c_j \exp\left[\mu(x_{it} + x_{js}) + \sigma^2(x_{it} + x_{js})^2/2\right] f_{\mathbf{X}}(\mathbf{x}) d\mathbf{x} \\ &\quad - \left[ \int \sum_{i=1}^N \sum_{t=1}^T c_i \exp\{x_{it}\mu + \sigma^2 x_{it}^2/2\} f_{\mathbf{X}}(\mathbf{x}) d\mathbf{x} \right]^2 \end{aligned}$$

**Corollary 1.**

Suppose  $\beta$  is a scalar random variable and  $\mathbf{X}$  is a random vector of length  $N \times T$ . Let  $\beta$  be Normally distributed,  $\beta \sim N(\mu, \sigma^2)$ , and assume  $\mathbf{X}$  and  $\mathbf{W}$  each has some arbitrary multivariate distribution  $F_{\mathbf{X}}$  and  $F_{\mathbf{W}}$  respectively. Also assume that  $\beta, \mathbf{X}, \mathbf{W}$  are mutually independent. Let  $c_1, \dots, c_N$  be constants.

Then define a new scalar random variables  $D, A$  such that  $D = \sum_{i=1}^N \sum_{t=1}^T c_i \exp(\beta X_{it})$  and  $A = \sum_{i=1}^N \sum_{t=1}^T c_i \exp(\beta W_{it})$ . It follows that

(i) the expectation of  $D - A$  is

$$E(D-A) = \int \sum_{t=1}^T \sum_{i=1}^N c_i \exp\{x_{it}\mu + \sigma^2 x_{it}^2/2\} f_{\mathbf{X}}(\mathbf{x}) d\mathbf{x} - \int \sum_{t=1}^T \sum_{i=1}^N c_i \exp\{w_{it}\mu + \sigma^2 w_{it}^2/2\} f_{\mathbf{W}}(\mathbf{w}) d\mathbf{w},$$

and

(ii) the variance of  $D - A$  is

$$\begin{aligned} Var(D-A) &= \int \sum_{i=1}^N \sum_{j=1}^N \sum_{t=1}^T \sum_{s=1}^T c_i c_j \exp[\mu(x_{it} + x_{js}) + \sigma^2(x_{it} + x_{js})^2/2] f_{\mathbf{X}}(\mathbf{x}) d\mathbf{x} \\ &\quad - \left[ \int \sum_{i=1}^N \sum_{t=1}^T c_i \exp\{x_{it}\mu + \sigma^2 x_{it}^2/2\} f_{\mathbf{X}}(\mathbf{x}) d\mathbf{x} \right]^2 \\ &\quad + \int \sum_{i=1}^N \sum_{j=1}^N \sum_{t=1}^T \sum_{s=1}^T c_i c_j \exp[\mu(w_{it} + w_{js}) + \sigma^2(w_{it} + w_{js})^2/2] f_{\mathbf{W}}(\mathbf{w}) d\mathbf{w} \\ &\quad - \left[ \int \sum_{i=1}^N \sum_{t=1}^T c_i \exp\{w_{it}\mu + \sigma^2 w_{it}^2/2\} f_{\mathbf{W}}(\mathbf{w}) d\mathbf{w} \right]^2 \\ &\quad - 2 \int \sum_{i=1}^N \sum_{j=1}^N \sum_{t=1}^T \sum_{s=1}^T c_i c_j \exp[\mu(x_{it} + w_{js}) + \sigma^2(x_{it} + w_{js})^2/2] f_{\mathbf{X}}(\mathbf{x}) f_{\mathbf{W}}(\mathbf{w}) d\mathbf{x} d\mathbf{w} \\ &\quad + 2 \left[ \int \sum_{i=1}^N \sum_{t=1}^T c_i \exp\{x_{it}\mu + \sigma^2 x_{it}^2/2\} f_{\mathbf{X}}(\mathbf{x}) d\mathbf{x} \right] \left[ \int \sum_{i=1}^N \sum_{t=1}^T c_i \exp\{w_{it}\mu + \sigma^2 w_{it}^2/2\} f_{\mathbf{W}}(\mathbf{w}) d\mathbf{w} \right] \end{aligned}$$

**Proof of Corollary 1.**

Proof of (i).

By linearity of expectation and Lemma 1, we have our result.

$$\begin{aligned} E(D-A) &= E(D) - E(A) \\ &= \int \sum_{t=1}^T \sum_{i=1}^N c_i \exp\{x_{it}\mu + \sigma^2 x_{it}^2/2\} f_{\mathbf{X}}(\mathbf{x}) d\mathbf{x} - \int \sum_{t=1}^T \sum_{i=1}^N c_i \exp\{w_{it}\mu + \sigma^2 w_{it}^2/2\} f_{\mathbf{W}}(\mathbf{w}) d\mathbf{w} \end{aligned}$$

Proof of (ii).

First,

$$\text{Var}(D - A) = \text{Var}(D) + \text{Var}(A) - 2\text{Cov}(D, A)$$

From Lemma 1, we have expressions for  $\text{Var}(D)$  and  $\text{Var}(A)$ . Next, we derive an expression for  $E[DA]$  by following the same steps as the proof of Lemma 1 (ii).

$E(DA)$

$$\begin{aligned} &= \int \int \int DA f_{\beta}(\beta) f_{\mathbf{X}}(\mathbf{x}) d\beta d\mathbf{x} d\mathbf{w} \\ &= \int \int \left\{ \sum_{i=1}^N \sum_{t=1}^T c_i \exp(\beta x_{it}) \right\} \left\{ \sum_{j=1}^N \sum_{s=1}^T c_j \exp(\beta w_{js}) \right\} \frac{1}{\sqrt{2\pi\sigma^2}} \exp\{-\beta^2/(2\sigma^2)\} f_{\mathbf{X}}(\mathbf{x}) f_{\mathbf{W}}(\mathbf{w}) d\beta d\mathbf{x} d\mathbf{w} \\ &= \int \int \sum_{i=1}^N \sum_{j=1}^N \sum_{t=1}^T \sum_{s=1}^T c_i \exp(\beta x_{it}) c_j \exp(\beta w_{js}) \frac{1}{\sqrt{2\pi\sigma^2}} \exp\{-\beta^2/(2\sigma^2)\} f_{\mathbf{X}}(\mathbf{x}) f_{\mathbf{W}}(\mathbf{w}) d\beta d\mathbf{x} d\mathbf{w} \\ &= \int \int \sum_{i=1}^N \sum_{j=1}^N \sum_{t=1}^T \sum_{s=1}^T c_i c_j \frac{1}{\sqrt{2\pi\sigma^2}} \exp[-\{\beta^2 - 2\mu\beta + \mu^2 - 2\sigma^2\beta(x_{it} + w_{js})\}/(2\sigma^2)] f_{\mathbf{X}}(\mathbf{x}) f_{\mathbf{W}}(\mathbf{w}) d\beta d\mathbf{x} d\mathbf{w} \\ &= \int \int \sum_{i=1}^N \sum_{j=1}^N \sum_{t=1}^T \sum_{s=1}^T c_i c_j \frac{1}{\sqrt{2\pi\sigma^2}} \exp\left[-\{\beta^2 - 2\beta(\mu + \sigma^2 x_{it} + \sigma^2 w_{js}) + (\mu + \sigma^2 x_{it} + \sigma^2 w_{js})^2 - (\mu + \sigma^2 x_{it} + \sigma^2 w_{js})^2 + \mu^2\}/(2\sigma^2)\right] f_{\mathbf{X}}(\mathbf{x}) f_{\mathbf{W}}(\mathbf{w}) d\beta d\mathbf{x} d\mathbf{w} \\ &= \int \sum_{i=1}^N \sum_{j=1}^N \sum_{t=1}^T \sum_{s=1}^T c_i c_j \left\{ \int \frac{1}{\sqrt{2\pi\sigma^2}} \exp[-\{\beta - (\mu + \sigma^2 x_{it} + \sigma^2 w_{js})\}^2/(2\sigma^2)] d\beta \right\} \\ &\quad \cdot \exp[\mu(x_{it} + w_{js}) + \sigma^2(x_{it} + w_{js})^2/2] f_{\mathbf{X}}(\mathbf{x}) f_{\mathbf{W}}(\mathbf{w}) d\mathbf{x} d\mathbf{w} \\ &= \int \sum_{i=1}^N \sum_{j=1}^N \sum_{t=1}^T \sum_{s=1}^T c_i c_j \exp[\mu(x_{it} + w_{js}) + \sigma^2(x_{it} + w_{js})^2/2] f_{\mathbf{X}}(\mathbf{x}) f_{\mathbf{W}}(\mathbf{w}) d\mathbf{x} d\mathbf{w} \end{aligned}$$

Hence,

$$\begin{aligned} \text{Var}(D - A) &= \int \sum_{i=1}^N \sum_{j=1}^N \sum_{t=1}^T \sum_{s=1}^T c_i c_j \exp[\mu(x_{it} + x_{js}) + \sigma^2(x_{it} + x_{js})^2/2] f_{\mathbf{X}}(\mathbf{x}) d\mathbf{x} \\ &\quad - \left[ \int \sum_{i=1}^N \sum_{t=1}^T c_i \exp\{x_{it}\mu + \sigma^2 x_{it}^2/2\} f_{\mathbf{X}}(\mathbf{x}) d\mathbf{x} \right]^2 \\ &\quad + \int \sum_{i=1}^N \sum_{j=1}^N \sum_{t=1}^T \sum_{s=1}^T c_i c_j \exp[\mu(w_{it} + w_{js}) + \sigma^2(w_{it} + w_{js})^2/2] f_{\mathbf{W}}(\mathbf{w}) d\mathbf{w} \\ &\quad - \left[ \int \sum_{i=1}^N \sum_{t=1}^T c_i \exp\{w_{it}\mu + \sigma^2 w_{it}^2/2\} f_{\mathbf{W}}(\mathbf{w}) d\mathbf{w} \right]^2 \\ &\quad - 2 \int \sum_{i=1}^N \sum_{j=1}^N \sum_{t=1}^T \sum_{s=1}^T c_i c_j \exp[\mu(x_{it} + w_{js}) + \sigma^2(x_{it} + w_{js})^2/2] f_{\mathbf{X}}(\mathbf{x}) f_{\mathbf{W}}(\mathbf{w}) d\mathbf{x} d\mathbf{w} \\ &\quad + 2 \left[ \int \sum_{i=1}^N \sum_{t=1}^T c_i \exp\{x_{it}\mu + \sigma^2 x_{it}^2/2\} f_{\mathbf{X}}(\mathbf{x}) d\mathbf{x} \right] \left[ \int \sum_{i=1}^N \sum_{t=1}^T c_i \exp\{w_{it}\mu + \sigma^2 w_{it}^2/2\} f_{\mathbf{W}}(\mathbf{w}) d\mathbf{w} \right] \end{aligned}$$

## Monte Carlo Procedure and Simplifications

### Monte Carlo for percent change in total summertime mortality

The integrals derived in Section 3.2 can be approximated by Monte Carlo as follows. First, simulate  $M$  realizations of summertime ozone in the present,  $\mathbf{X}^{P,1}, \dots, \mathbf{X}^{P,M}$  and  $M'$  realizations of summertime ozone in the future,  $\mathbf{X}^{F,1}, \dots, \mathbf{X}^{F,M'}$ . Also simulate  $K$  realizations of  $\beta$  from the posterior distribution for the health effect,  $\beta^1, \dots, \beta^K$ . Then, Equation (3) can be approximated as

$$\frac{1}{M'} \frac{1}{M} \frac{1}{K} \sum_{m'=1}^{M'} \sum_{k=1}^K \sum_{m=1}^M \left\{ \frac{\eta(\beta^k, \mathbf{X}^{F,m'}) - \eta(\beta^k, \mathbf{X}^{P,m})}{\eta(\beta^k, \mathbf{X}^{P,m})} \right\}.$$

And Equation (4) can be approximated as

$$\frac{1}{M} \frac{1}{M'} \frac{1}{K} \sum_{m=1}^M \sum_{m'=1}^{M'} \sum_{k=1}^K I \left[ \left\{ \frac{\eta(\beta^k, \mathbf{X}^{F,m'}) - \eta(\beta^k, \mathbf{X}^{P,m})}{\eta(\beta^k, \mathbf{X}^{P,m})} \right\} \leq a \right].$$

### Monte Carlo for change in total summertime mortality

The integrals derived in Section 3.3 can be approximated by Monte Carlo as follows. Given  $M$  realizations of summertime ozone in the present,  $\mathbf{X}^{P,1}, \dots, \mathbf{X}^{P,M}$ , and  $M'$  realizations of summertime ozone in the future,  $\mathbf{X}^{F,1}, \dots, \mathbf{X}^{F,M'}$ , and  $K$  realizations of  $\beta$  from the posterior distribution for the health effect,  $\beta^1, \dots, \beta^K$ , Equation (6), can be approximated as

$$\frac{1}{M'} \frac{1}{K} \sum_{m'=1}^{M'} \sum_{k=1}^K \eta(\beta^k, \mathbf{X}^{F,m'}) - \frac{1}{M} \frac{1}{K} \sum_{m=1}^M \sum_{k=1}^K \eta(\beta^k, \mathbf{X}^{P,m}).$$

This approximates the posterior mean of the difference in expected summertime mortality between the future and the present. Equation (7) can be approximated as

$$\frac{1}{M} \frac{1}{M'} \frac{1}{K} \sum_{m=1}^M \sum_{m'=1}^{M'} \sum_{k=1}^K I \left[ \eta(\beta^k, \mathbf{X}^{F,m'}) - \eta(\beta^k, \mathbf{X}^{P,m}) \leq a \right].$$

This approximates the c.d.f. of the posterior of the difference in expected summertime mortality between the future and the present for any  $a$ . To obtain the bounds for the central 95% credible interval, we approximate the inverse of the c.d.f by computing the 0.025 and 0.975 quantiles over all the Monte Carlo samples.

## Web Appendix B

Web Figure 1: *Ozone concentration projections at 12km resolution and thin plate spline interpolation of surface to 2km resolution, North Carolina.*

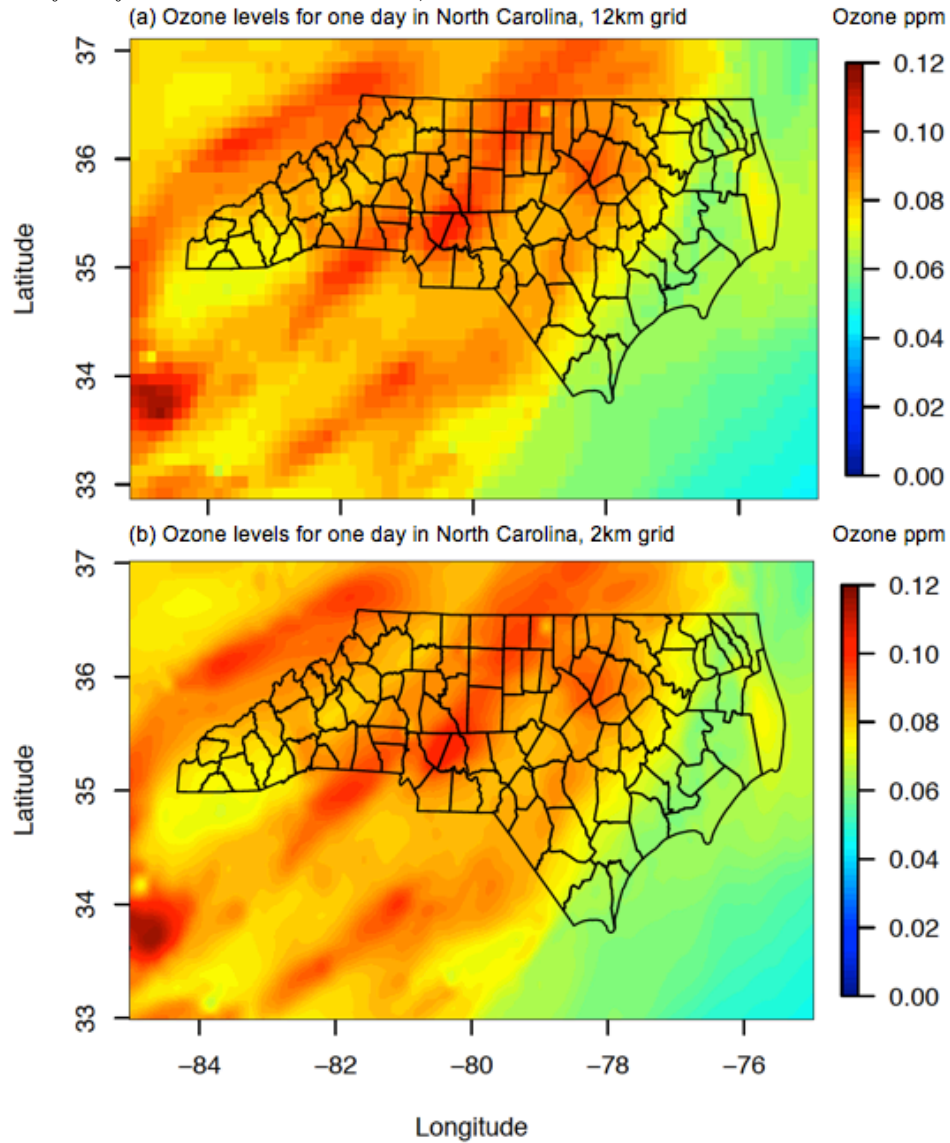



Web Figure 2: *Ozone 24-hour average concentrations from atmospheric chemistry simulations at a 12km resolution over the U.S., for one day in the present, Future S, and Future R (a-c), for one summer in the present, Future S, and Future R (d-f), with the corresponding estimate of ozone-related mortality for that summer using the mean estimated health association parameter (g-i).*

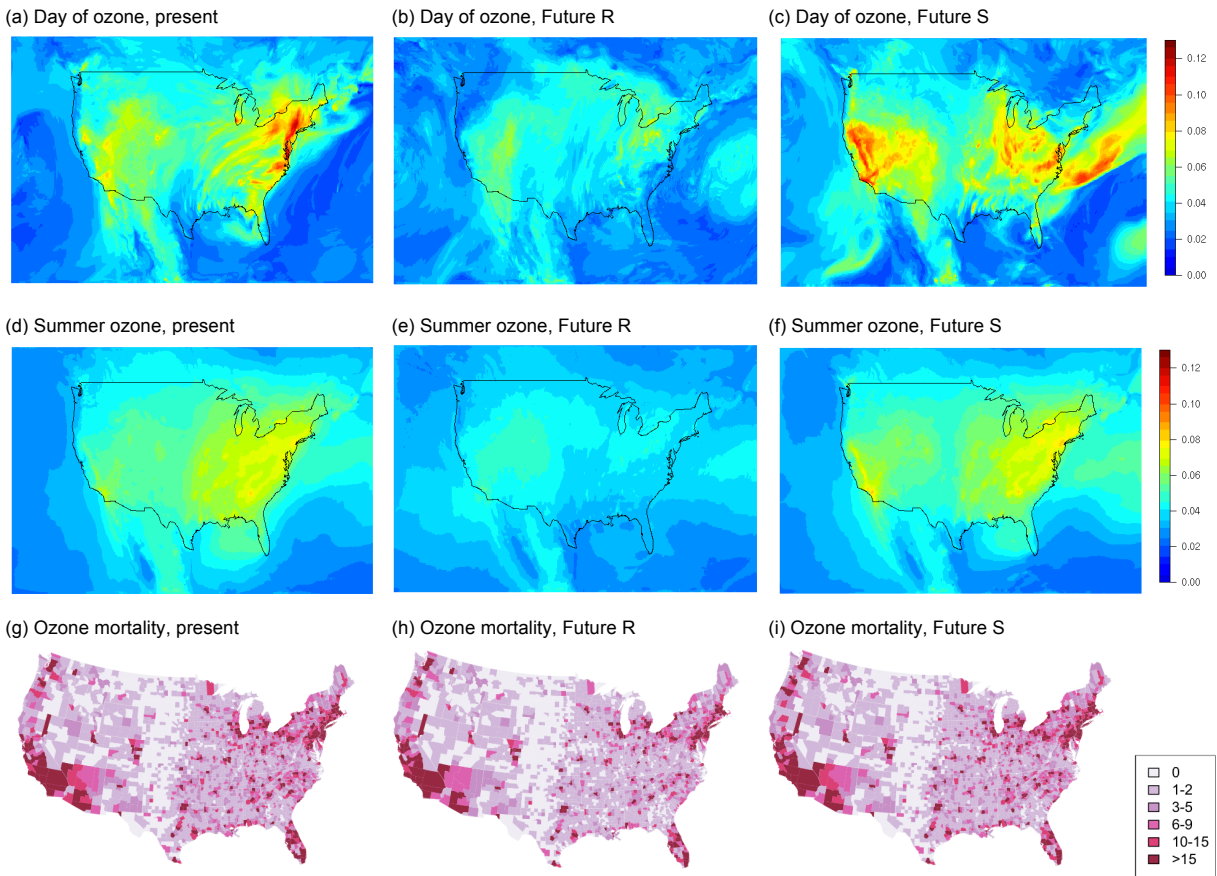

Web Table 1: *Estimated change in ozone-related deaths in summertime and estimated percent change in total summertime mortality attributable to ozone in each state for Future S compared to the present.*

| StateName            | Difference |      |       | Percent Change |       |       |
|----------------------|------------|------|-------|----------------|-------|-------|
|                      | Mean       | 2.5% | 97.5% | Mean           | 2.5%  | 97.5% |
| DELAWARE             | 2          | -7   | 14    | 0.16           | -0.45 | 0.90  |
| DISTRICT OF COLUMBIA | 3          | -6   | 13    | 0.21           | -0.35 | 0.83  |
| ALABAMA              | 27         | -45  | 98    | 0.27           | -0.44 | 0.96  |
| FLORIDA              | 37         | -151 | 232   | 0.10           | -0.41 | 0.63  |
| GEORGIA              | 36         | -69  | 143   | 0.26           | -0.48 | 1.01  |
| IDAHO                | 6          | -1   | 13    | 0.30           | -0.04 | 0.61  |
| ILLINOIS             | 53         | -98  | 198   | 0.23           | -0.42 | 0.85  |
| INDIANA              | 43         | -29  | 126   | 0.35           | -0.23 | 1.00  |
| IOWA                 | 21         | -16  | 65    | 0.33           | -0.26 | 1.02  |
| KANSAS               | 16         | -17  | 52    | 0.31           | -0.32 | 0.97  |
| KENTUCKY             | 27         | -27  | 83    | 0.31           | -0.31 | 0.95  |
| LOUISIANA            | 17         | -49  | 75    | 0.19           | -0.53 | 0.80  |
| MAINE                | 4          | -8   | 17    | 0.14           | -0.29 | 0.62  |
| MARYLAND             | 19         | -37  | 84    | 0.20           | -0.37 | 0.84  |
| MASSACHUSETTS        | 18         | -58  | 104   | 0.14           | -0.44 | 0.79  |
| MICHIGAN             | 46         | -74  | 169   | 0.24           | -0.38 | 0.87  |
| MINNESOTA            | 22         | -10  | 68    | 0.26           | -0.11 | 0.81  |
| MISSISSIPPI          | 15         | -30  | 56    | 0.24           | -0.49 | 0.91  |
| MISSOURI             | 36         | -34  | 109   | 0.29           | -0.27 | 0.87  |
| MONTANA              | 4          | -0   | 10    | 0.20           | -0.02 | 0.54  |
| NEBRASKA             | 11         | -4   | 31    | 0.32           | -0.13 | 0.93  |
| NEVADA               | 11         | 3    | 23    | 0.33           | 0.08  | 0.65  |
| NEW HAMPSHIRE        | 5          | -5   | 18    | 0.21           | -0.25 | 0.82  |
| NEW JERSEY           | 21         | -84  | 142   | 0.13           | -0.50 | 0.85  |
| NEW MEXICO           | 6          | -4   | 19    | 0.20           | -0.14 | 0.66  |
| NEW YORK             | 33         | -144 | 229   | 0.09           | -0.40 | 0.65  |
| NORTH CAROLINA       | 24         | -75  | 135   | 0.15           | -0.47 | 0.85  |
| NORTH DAKOTA         | 3          | -2   | 10    | 0.21           | -0.13 | 0.73  |
| OHIO                 | 74         | -71  | 249   | 0.31           | -0.29 | 1.02  |
| OKLAHOMA             | 23         | -28  | 67    | 0.30           | -0.36 | 0.87  |
| OREGON               | 17         | -9   | 46    | 0.25           | -0.14 | 0.68  |
| PENNSYLVANIA         | 72         | -92  | 258   | 0.24           | -0.31 | 0.86  |
| ARIZONA              | 15         | -13  | 42    | 0.17           | -0.15 | 0.48  |
| RHODE ISLAND         | 2          | -15  | 21    | 0.09           | -0.64 | 0.90  |
| SOUTH CAROLINA       | 11         | -50  | 73    | 0.14           | -0.61 | 0.91  |
| SOUTH DAKOTA         | 5          | -1   | 12    | 0.29           | -0.05 | 0.77  |
| TENNESSEE            | 37         | -41  | 116   | 0.29           | -0.31 | 0.89  |
| TEXAS                | 73         | -152 | 266   | 0.22           | -0.45 | 0.79  |
| UTAH                 | 9          | 2    | 17    | 0.33           | 0.09  | 0.62  |
| VERMONT              | 3          | -2   | 10    | 0.22           | -0.20 | 0.84  |
| VIRGINIA             | 26         | -41  | 103   | 0.20           | -0.33 | 0.82  |
| WASHINGTON           | 26         | -10  | 69    | 0.27           | -0.10 | 0.69  |
| ARKANSAS             | 16         | -29  | 57    | 0.26           | -0.47 | 0.91  |
| WEST VIRGINIA        | 13         | -16  | 44    | 0.27           | -0.33 | 0.94  |
| WISCONSIN            | 23         | -35  | 85    | 0.22           | -0.34 | 0.83  |
| WYOMING              | 3          | 1    | 6     | 0.34           | 0.09  | 0.70  |
| CALIFORNIA           | 166        | 12   | 404   | 0.32           | 0.02  | 0.78  |
| COLORADO             | 23         | 8    | 46    | 0.36           | 0.13  | 0.73  |
| CONNECTICUT          | 7          | -37  | 56    | 0.10           | -0.54 | 0.82  |

Web Table 2: *Estimated change in ozone-related deaths in summertime and estimated percent change in total summertime mortality attributable to ozone in each state for Future R compared to the present.*

| StateName            | Difference |      |       | Percent Change |       |       |
|----------------------|------------|------|-------|----------------|-------|-------|
|                      | Mean       | 2.5% | 97.5% | Mean           | 2.5%  | 97.5% |
| DELAWARE             | -16        | -29  | -6    | -1.07          | -1.91 | -0.38 |
| DISTRICT OF COLUMBIA | -5         | -14  | 2     | -0.30          | -0.88 | 0.15  |
| ALABAMA              | -99        | -188 | -44   | -0.98          | -1.84 | -0.44 |
| FLORIDA              | -24        | -186 | 133   | -0.06          | -0.50 | 0.36  |
| GEORGIA              | -128       | -240 | -46   | -0.90          | -1.67 | -0.32 |
| IDAHO                | -5         | -11  | -1    | -0.24          | -0.50 | -0.05 |
| ILLINOIS             | -48        | -198 | 55    | -0.21          | -0.84 | 0.24  |
| INDIANA              | -82        | -161 | -25   | -0.65          | -1.26 | -0.20 |
| IOWA                 | -41        | -81  | -10   | -0.64          | -1.27 | -0.15 |
| KANSAS               | -31        | -68  | -4    | -0.58          | -1.27 | -0.07 |
| KENTUCKY             | -75        | -136 | -35   | -0.86          | -1.54 | -0.40 |
| LOUISIANA            | -50        | -117 | -17   | -0.54          | -1.25 | -0.18 |
| MAINE                | -22        | -37  | -10   | -0.78          | -1.32 | -0.35 |
| MARYLAND             | -81        | -156 | -27   | -0.81          | -1.54 | -0.28 |
| MASSACHUSETTS        | -75        | -154 | -18   | -0.57          | -1.15 | -0.14 |
| MICHIGAN             | -67        | -185 | 2     | -0.35          | -0.94 | 0.01  |
| MINNESOTA            | -15        | -45  | 9     | -0.18          | -0.53 | 0.11  |
| MISSISSIPPI          | -56        | -107 | -22   | -0.91          | -1.74 | -0.36 |
| MISSOURI             | -84        | -165 | -24   | -0.67          | -1.30 | -0.20 |
| MONTANA              | -4         | -8   | 0     | -0.20          | -0.43 | 0.01  |
| NEBRASKA             | -11        | -27  | 2     | -0.33          | -0.82 | 0.07  |
| NEVADA               | -20        | -33  | -11   | -0.59          | -0.94 | -0.31 |
| NEW HAMPSHIRE        | -21        | -35  | -9    | -0.98          | -1.61 | -0.43 |
| NEW JERSEY           | -78        | -185 | 9     | -0.46          | -1.09 | 0.05  |
| NEW MEXICO           | -4         | -15  | 4     | -0.16          | -0.53 | 0.14  |
| NEW YORK             | -27        | -187 | 136   | -0.08          | -0.52 | 0.38  |
| NORTH CAROLINA       | -159       | -280 | -67   | -1.00          | -1.75 | -0.43 |
| NORTH DAKOTA         | -3         | -8   | 2     | -0.22          | -0.57 | 0.12  |
| OHIO                 | -147       | -304 | -48   | -0.60          | -1.24 | -0.20 |
| OKLAHOMA             | -56        | -114 | -17   | -0.73          | -1.46 | -0.23 |
| OREGON               | -7         | -31  | 14    | -0.11          | -0.46 | 0.22  |
| PENNSYLVANIA         | -219       | -424 | -77   | -0.73          | -1.40 | -0.26 |
| ARIZONA              | -32        | -69  | -10   | -0.38          | -0.79 | -0.12 |
| RHODE ISLAND         | -17        | -34  | -4    | -0.75          | -1.45 | -0.16 |
| SOUTH CAROLINA       | -75        | -141 | -25   | -0.92          | -1.72 | -0.32 |
| SOUTH DAKOTA         | -4         | -10  | 0     | -0.28          | -0.61 | 0.03  |
| TENNESSEE            | -121       | -223 | -56   | -0.93          | -1.69 | -0.44 |
| TEXAS                | -64        | -277 | 69    | -0.19          | -0.82 | 0.21  |
| UTAH                 | -1         | -7   | 5     | -0.04          | -0.25 | 0.17  |
| VERMONT              | -14        | -24  | -6    | -1.20          | -1.98 | -0.56 |
| VIRGINIA             | -133       | -229 | -59   | -1.05          | -1.79 | -0.47 |
| WASHINGTON           | -10        | -44  | 17    | -0.10          | -0.44 | 0.17  |
| ARKANSAS             | -60        | -113 | -27   | -0.95          | -1.78 | -0.43 |
| WEST VIRGINIA        | -58        | -97  | -32   | -1.23          | -2.02 | -0.68 |
| WISCONSIN            | -54        | -118 | -12   | -0.52          | -1.14 | -0.12 |
| WYOMING              | -2         | -4   | -0    | -0.22          | -0.46 | -0.01 |
| CALIFORNIA           | -94        | -263 | 88    | -0.18          | -0.51 | 0.17  |
| COLORADO             | -2         | -13  | 14    | -0.03          | -0.21 | 0.22  |
| CONNECTICUT          | -43        | -87  | -6    | -0.63          | -1.27 | -0.09 |

Web Figure 3: *Percent change in expected total summertime mortality attributable to ozone under Future S for each county in California, comparing our Bayesian model with Monte Carlo estimation method to the double averaging method.*

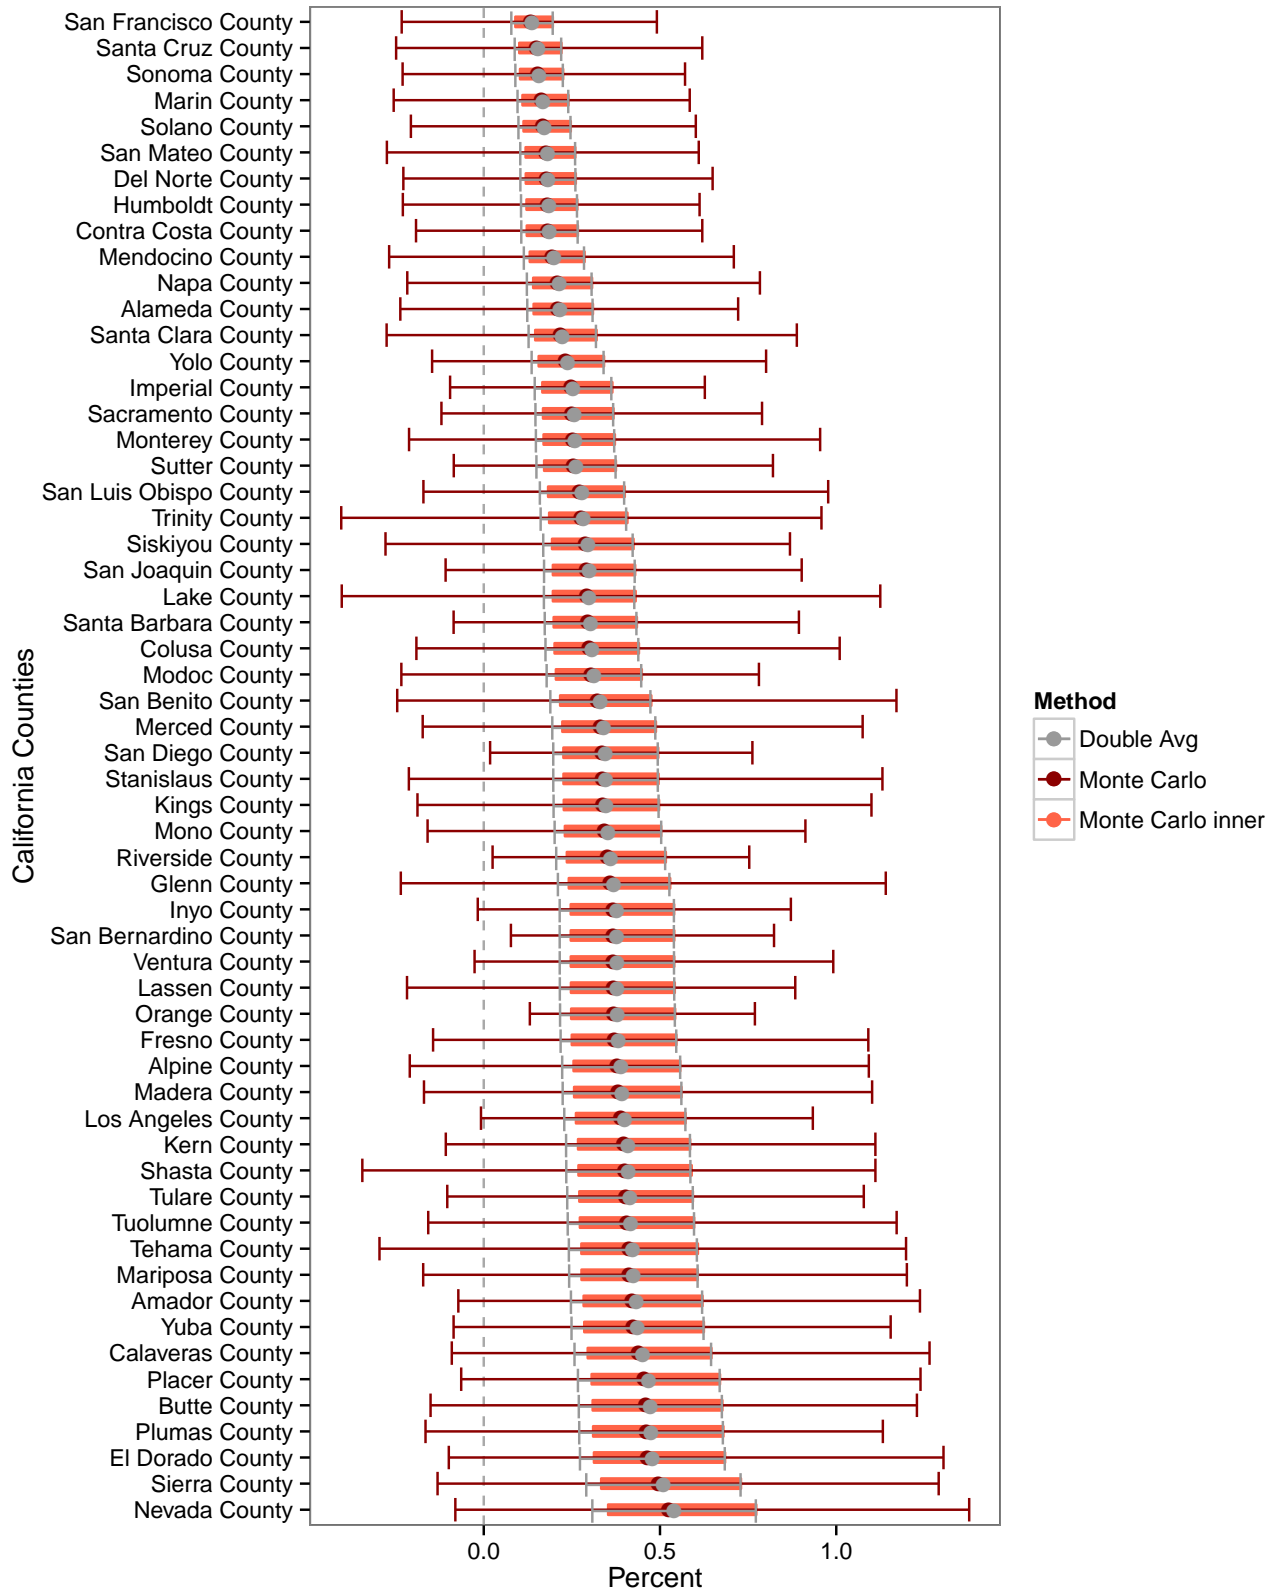

Web Figure 4: *Percent change in expected total summertime mortality attributable to ozone under Future R for each county in California, comparing our Bayesian model with Monte Carlo estimation method to the double averaging method.*

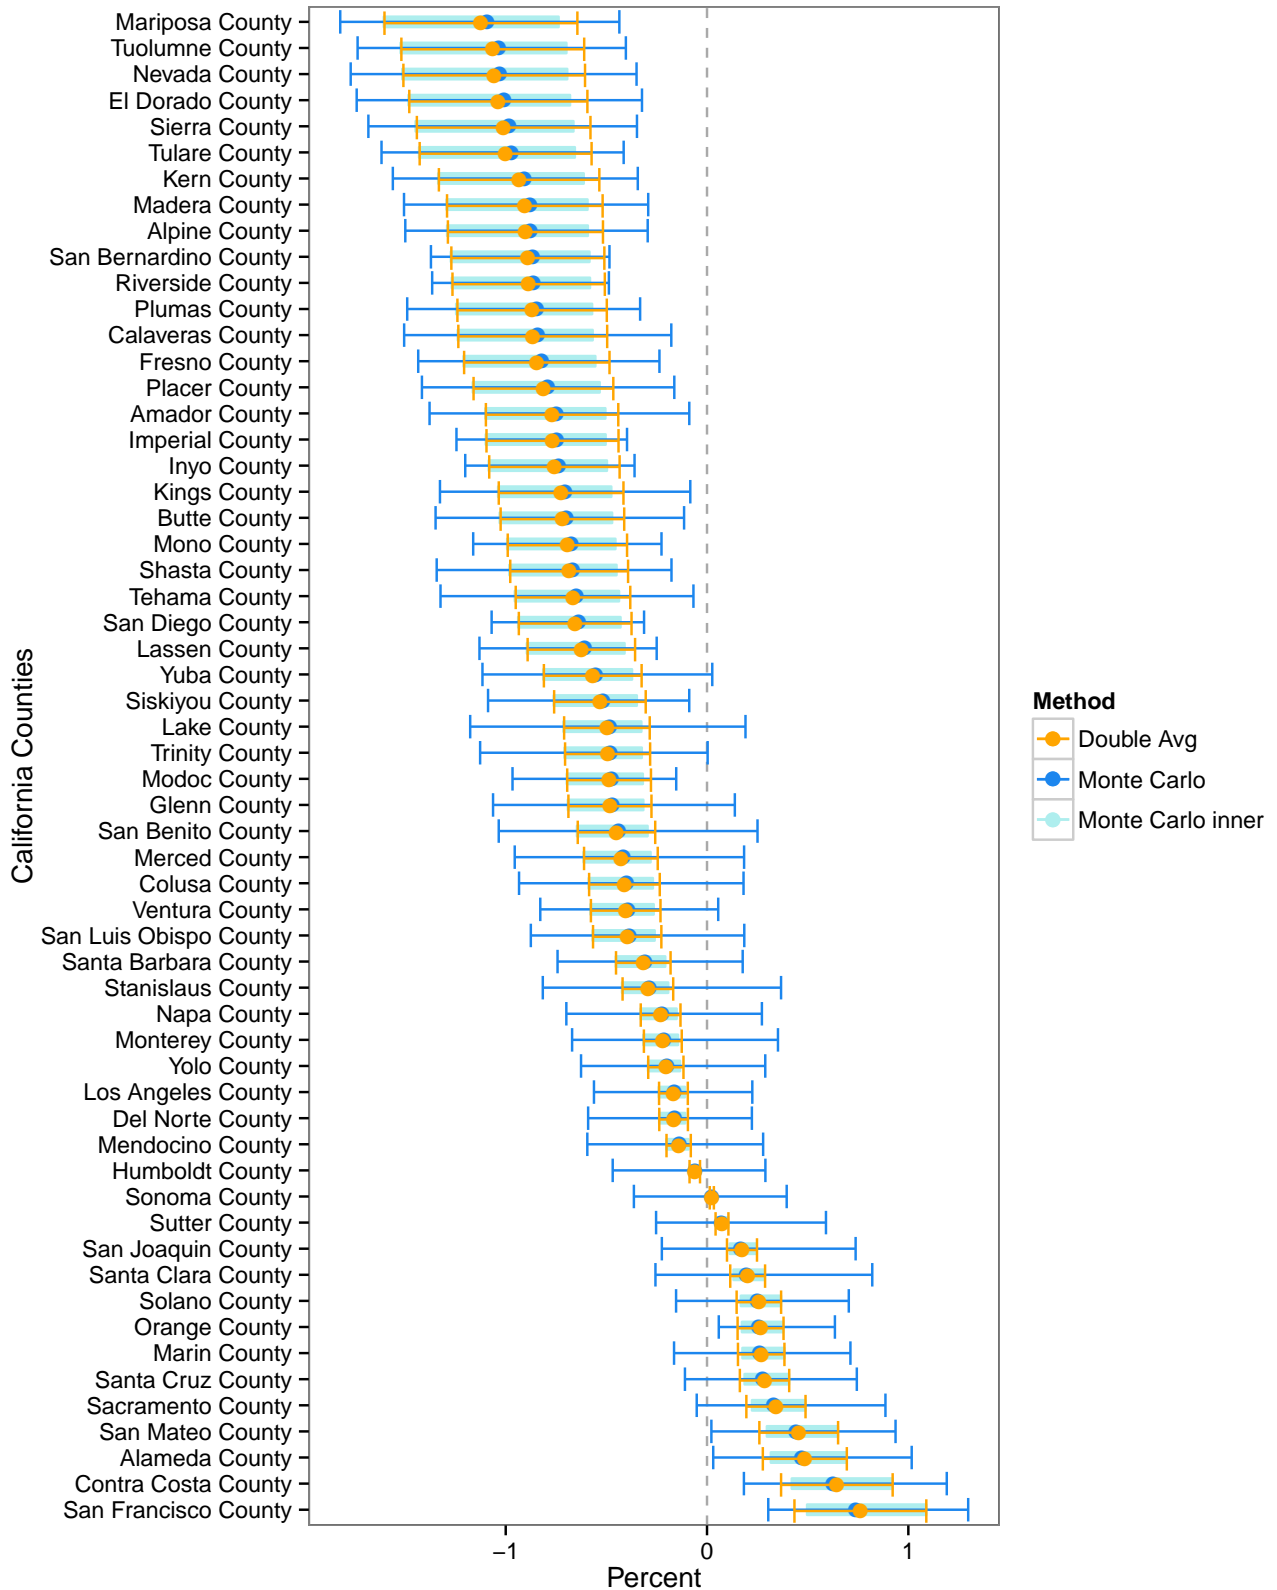

Web Figure 5: *Histogram of the Monte Carlo samples of ozone mortality over  $\beta$  and ozone, versus the Normal distribution using the mean and variance solution using the exact integral with respect to  $\beta$ .*

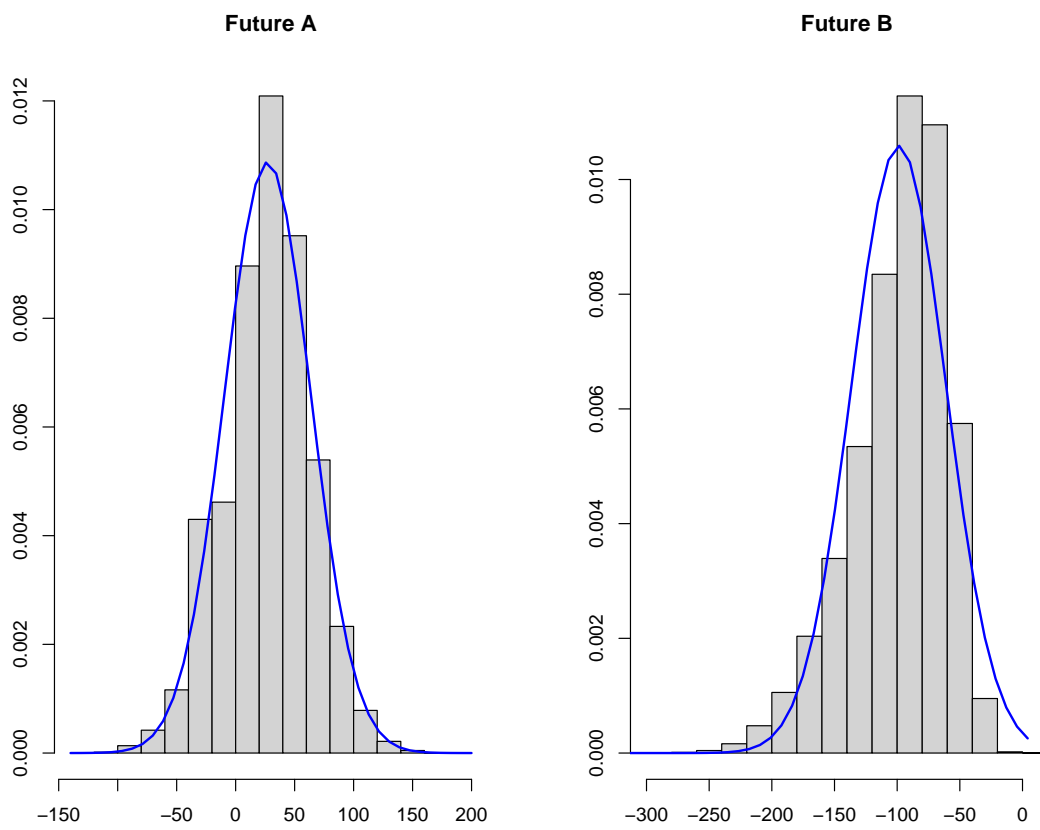

## Web Appendix C

```

# Part I: Build my Ozone database
# for County average ozone
# with kriging interpolation step for change of support

# Stacey Alexeeff

# ----- #
# Program Notes:
#   Creates a database in netcdf file "O3data_state##_county_YYYY_v04.nc"
#   Year read in from UNIX by echo command as variable "year1"
#   Read in my data from all "O3data_YYYY.nc"
#   For interpolation, uses fields package

# ----- #
# Run Job Notes:
#   Run on geyser (one job, one node)
#   "Run_MyO3Data_county_netcdf_allyears_v04.lsf"
# ----- #

library( ncdf4)
library( fields, lib.loc=~ /work/Rpackages")

# ----- #
# READ in data

# Read in O3 for year1 from "O3data_YYYY.nc"
file.year1 <- paste("~/O3data/O3data_",year1,".nc",sep="")
NETCDF.year1 <- nc_open(file.year1)
  # daily O3 avgs for 92 days of summer
  O3_day_max1hr_array <- ncvar_get(NETCDF.year1, "O3_max1hr")
  O3_day_max8hr_array <- ncvar_get(NETCDF.year1, "O3_max8hr")
  O3_day_avg24hr_array <- ncvar_get(NETCDF.year1, "O3_avg24hr")
  # Lat, Long matrices
  Latitude <- ncvar_get(NETCDF.year1, "Latitude")
  Longitude <- ncvar_get(NETCDF.year1, "Longitude")
  # Date
  Date.char <- ncvar_get(NETCDF.year1, "Date")
nc_close(NETCDF.year1)

# Read in County labels
# Labels assign each gridbox to a county - 2km
County.2km.lab <- read.csv("~/Censusdata/County_2km_labels.csv", row.names="X")
# Create State column
County.2km.lab$State <- ifelse( nchar(as.character(County.2km.lab$CountyID))==4,
  substr(County.2km.lab$CountyID, 1,1 ), substr(County.2km.lab$CountyID, 1,2 ) )
StateCountyList <- na.omit( unique( subset(County.2km.lab, select=c(CountyID, State ) ) ) )
StateNCountyList <- data.frame( table( StateCountyList$State) )
names(StateNCountyList) <- c("State","N_county")

mystates = c( 1,4,5,6,8,9,10,11,12,13,16,17,18,19,20,21,22,23,24,25,26,27,28,29,30,31,32,33,
  34,35,36,37,38,39,40,41,42,44,45,46,47,48,49,50,51,53,54,55,56 ) # FIPS number
N_days=92

```

```

# ----- #
# OUTPUT - create netcdf file "03data_state##_county_YYYY_v04.nc"

# function to generate netcdf files for each state
create.netcdf.state <- function( state1, N_county ){

  # Define dimensions for variables for my new netcdf file
  N_days = 92; N_years = 13
  county_index <- ncdim_def( "county_index", units="index county", vals=1:N_county )
  day_index <- ncdim_def( "day_index", units="index days of summer", vals=1:N_days)
  year_index <- ncdim_def( "year_index", units="index year of simulation", vals=1)
  dimnchar <- ncdim_def("nchar", "", 1:10, create_dimvar=FALSE )
  dim3char <- ncdim_def("char3", "", 1:3, create_dimvar=FALSE )

  # Define variables for my new netcdf file
  O3_max1hr <- ncvar_def( name="O3_max1hr", units="ppmv",
    dim=list(county_index,day_index,year_index),
    missval=NA,
    longname="1hr max O3 concentration at surface",
    prec="single")
  O3_max8hr <- ncvar_def( name="O3_max8hr", units="ppmv",
    dim=list(county_index,day_index,year_index),
    missval=NA,
    longname="8hr max O3 concentration at surface",
    prec="single")
  O3_avg24hr <- ncvar_def( name="O3_avg24hr", units="ppmv",
    dim=list(county_index,day_index,year_index),
    missval=NA,
    longname="24hr avg O3 concentration at surface",
    prec="single")
  CountyID <- ncvar_def( name="CountyID", units="",
    dim=list(dim3char,county_index),
    longname="County FIPS ID from Census",
    prec="char")
  Date <- ncvar_def( name="Date", units="",
    dim=list(dimnchar,day_index,year_index),
    longname="Date as character string",
    prec="char")

  # Create a new netcdf file for all my O3 data
  mynetcdf.filename <- paste("03data_state",state1,"_county_",year1,"_v04.nc",sep="")
  nc_create( mynetcdf.filename,
    vars=list(Date, O3_max1hr, O3_max8hr, O3_avg24hr, CountyID ),
    verbose=FALSE )

}

# apply this function to list of states to create netcdfs for each state
mapply(create.netcdf.state, StateNCountyList[,1],StateNCountyList[,2])

```



```

# ----- #
# FOR LOOP over days in summer
#   O3 data: interpolate, then average over county

# loop over days
for(day in 1:N_days){

  # O3 for day
  O3_day_max1hr_USA_xyz <- list( x=Longitude[,1], y=Latitude[,1], z=O3_day_max1hr_array[, ,day])
  O3_day_max8hr_USA_xyz <- list( x=Longitude[,1], y=Latitude[,1], z=O3_day_max8hr_array[, ,day])
  O3_day_avg24hr_USA_xyz<- list( x=Longitude[,1], y=Latitude[,1], z=O3_day_avg24hr_array[, ,day])

  # ----- #
  # INTERPOLATE daily O3 data from 12km to 2km

  if( day==1 ){    # fit interpolation and make grids only once
    # Fit thin plate spline with theta=0.25
    xg <- make.surface.grid( list( x=O3_day_max1hr_USA_xyz$x, y=O3_day_max1hr_USA_xyz$y))
    # interpolation, no smoothing
    TpsObject <- fastTps(xg, c( O3_day_max1hr_USA_xyz$z), theta = 0.25, lambda=0)
    # INTERPOLATE to 2km grid
    gridList<- list( x= seq( min(O3_day_avg24hr_USA_xyz$x), max(O3_day_avg24hr_USA_xyz$x),
                           length=length(O3_day_avg24hr_USA_xyz$x)*6),
                    y= seq( min(O3_day_avg24hr_USA_xyz$y), max(O3_day_avg24hr_USA_xyz$y),
                           length=length(O3_day_avg24hr_USA_xyz$y)*6) )
    # use version in fields 6.8.1
    Tps.max1hr.out <- predictSurfaceFastTps(TpsObject, gridList )
  }else{          # otherwise use existing grid and update interpolation
    Tps.max8hr.out <- predictSurfaceFastTps(TpsObject, gridList, ynew=c(O3_day_max1hr_USA_xyz$z))
  }

  # Update to 2km grid by changing O3 only, really fast
  Tps.max8hr.out <- predictSurfaceFastTps(TpsObject, gridList, ynew=c(O3_day_max8hr_USA_xyz$z))
  Tps.avg24hr.out <- predictSurfaceFastTps(TpsObject, gridList, ynew=c(O3_day_avg24hr_USA_xyz$z))

  # ----- #
  # AVERAGE OVER COUNTY
  # Average ozone over gridboxes within each NC county - 2km
  O3_county_day_max1hr <- tapply( as.vector(Tps.max1hr.out$z), County.2km.lab$CountyID, mean)
  O3_county_day_max8hr <- tapply( as.vector(Tps.max8hr.out$z), County.2km.lab$CountyID, mean)
  O3_county_day_avg24hr<- tapply( as.vector(Tps.avg24hr.out$z),County.2km.lab$CountyID, mean)

  # ----- #
  # OUTPUT - netcdf file "O3data_state##_county_YYYY_v04.nc"

  # Split data into a list by state
  state.factor <- ifelse( nchar(names(O3_county_day_max1hr))==4,
                        substr(names(O3_county_day_max1hr),1,1), substr(names(O3_county_day_max1hr),1,2))
  O3_county_day_max1hr_statelist <- split(O3_county_day_max1hr, state.factor)
  O3_county_day_max8hr_statelist <- split(O3_county_day_max8hr, state.factor)
  O3_county_day_avg24hr_statelist <- split(O3_county_day_avg24hr, state.factor)

```

```
for( i.state in 1:49){
  state1=names(table(state.factor))[i.state]
  # Write each county avg vector of O3 data to my netcdf file
  mynetcdf.filename <- paste("O3data_state",state1,"_county_",year1,"_v04.nc",sep="")
  NETCDF.new <- nc_open( mynetcdf.filename, write=TRUE )
  ncvar_put( NETCDF.new, varid="O3_max1hr", vals=O3_county_day_max1hr_statelist[[i.state]],
    start=c(1,day,1), count=c(-1,1,1) )
  ncvar_put( NETCDF.new, varid="O3_max8hr", vals=O3_county_day_max8hr_statelist[[i.state]],
    start=c(1,day,1), count=c(-1,1,1) )
  ncvar_put( NETCDF.new, varid="O3_avg24hr", vals=O3_county_day_avg24hr_statelist[[i.state]],
    start=c(1,day,1), count=c(-1,1,1) )
  ncvar_put( NETCDF.new, varid="Date", vals=Date.char, start=c(1,day,1), count=c(-1,1,1) )
  CountyID_statei <- ifelse( nchar(names( O3_county_day_avg24hr_statelist[[i.state]] ))==4,
    substr(names( O3_county_day_avg24hr_statelist[[i.state]] ),2,4),
    substr(names( O3_county_day_avg24hr_statelist[[i.state]] ), 3,5 ) )
  ncvar_put( NETCDF.new, varid="CountyID", vals=CountyID_statei, start=c(1,1), count=c(-1,-1))
  nc_close(NETCDF.new)
}

}

# END OF FOR LOOP
# ----- #
```

```
# Part II: Monte Carlo Sampling
# Ozone and Mortality - US
# Stacey Alexeeff

# ----- #
# Datasets used:
# Ozone simulations:
#   ~/O3data/O3data_state##_county_YYYY_v04.nc
#   for YYYY 1996-2008, 2046-2058, 2046a-2058a
#   for ## state codes (FIPS)
# Population (US Census 2000):
#   ~/Censusdata/USCensus2000_PopulationData_state##_County.csv
#   for ## state codes (FIPS)
#
# Program Notes:
#   "state1" variable read in from UNIX by echo command as part of batch job

# ----- #
library( ncdf4)
library( fields)
library( maps)

# ----- #
# settings
  K=100
  M=13

# ----- #
# Beta distribution from meta-analysis
# Bell et al. 2005, US only results
# 10-ppb increase in daily 24hr avg ozone associated with
# Pooled Log-relative rate, total mortality: 0.84%

# parameters for 1-ppb increase:
  mu_beta = 0.00084      # US only results
  sigma_beta = 0.000183  # US only results

# ----- #
# Census Data

# Population
  Census <- read.csv(paste("USCensus2000_PopulationData_state",state1,"_County.csv",sep=""))

# Number of counties
  Ncounty = nrow(Census)

# ----- #
# CDC Data
# Daily Mortality Rate for state

source(paste("~/CDCdata/MortalityRate_state",state1,".r",sep=""))
```

```

# ----- #
# Sampling - Future S vs. Present, Future vs. Present

deaths.summer.diff.F <- matrix(nrow=M*M*K,ncol=Ncounty)
deaths.summer.diff.FS <- matrix(nrow=M*M*K,ncol=Ncounty)
deaths.summer.pres <- matrix(nrow=M*M*K,ncol=Ncounty)
fun1 <- function(x,b){ sum( exp(b*x) ) }

# Present ozone data, loop over years
for(m1 in 1:M){
  year.m1 = (1996:2008)[m1]
  file.O3data.m1 <- paste("~/O3data/O3data_state",state1,"_county_",year.m1,"_v04.nc",sep="")
  NETCDF.O3data.m1 <- nc_open(file.O3data.m1)
  # present summer ozone, ppm, all counties
  O3_avg24hr_county.m1 <- array(NA, dim=c(Ncounty,92) )
  O3_avg24hr_county.m1[,] <- 1000*ncvar_get(NETCDF.O3data.m1, "O3_avg24hr")
  nc_close(NETCDF.O3data.m1)

  # Future, Future S ozone data, loop over years
  for(m2 in 1:M){
    year.m2 = (2046:2058)[m2]

    # Future S
    file.O3data.m2.FS <- paste("~/O3data/O3data_state",state1,"_county_",year.m2,"_a_v04.nc",sep="")
    NETCDF.O3data.m2.FS <- nc_open(file.O3data.m2.FS)
    # future summer ozone, ppm, all counties
    O3_avg24hr_county.m2.FS <- array(NA, dim=c(Ncounty,92) )
    O3_avg24hr_county.m2.FS[,] <- 1000*ncvar_get(NETCDF.O3data.m2.FS, "O3_avg24hr")
    nc_close(NETCDF.O3data.m2.FS)

    # Future
    file.O3data.m2.F <- paste("~/O3data/O3data_state",state1,"_county_",year.m2,"_v04.nc",sep="")
    NETCDF.O3data.m2.F <- nc_open(file.O3data.m2.F)
    # future summer ozone, ppm, all counties
    O3_avg24hr_county.m2.F <- array(NA, dim=c(Ncounty,92) )
    O3_avg24hr_county.m2.F[,] <- 1000*ncvar_get(NETCDF.O3data.m2.F, "O3_avg24hr")
    nc_close(NETCDF.O3data.m2.F)

    # loop over samples of beta
    for(k in 1:K){
      beta.k = rnorm(1, mean=mu_beta, sd=sigma_beta)

      mmk = M*M*(k-1) + M*(m1-1)+m2      # Index
      # Compute deaths for each county
      # Differences
      deaths.summer.diff.FS[mmk,] <- MR*Census$POP100*(apply(O3_avg24hr_county.m2.FS,1,fun1,beta.k)
        - apply(O3_avg24hr_county.m1,1,fun1,beta.k) )
      deaths.summer.diff.F[mmk,] <- MR*Census$POP100*(apply(O3_avg24hr_county.m2.F,1,fun1,beta.k)
        - apply(O3_avg24hr_county.m1,1,fun1,beta.k) )

      # Present total
      deaths.summer.pres[mmk,] <- MR*Census$POP100*(apply(O3_avg24hr_county.m1,1,fun1,beta.k) )
    }
  }
}
}

```

```
# ----- #  
# Save samples  
write.csv(deaths.summer.diff.FS,  
  paste("Results_Ozone_Mortality_Diff_FutureS_state",state1,"_County.csv",sep="") )  
write.csv(deaths.summer.diff.F,  
  paste("Results_Ozone_Mortality_Diff_Future_state",state1,"_County.csv",sep="") )  
write.csv(deaths.summer.pres,  
  paste("Results_Ozone_Mortality_Present_state",state1,"_County.csv",sep="") )
```
